# Supplementary material for: Recognition between CD147 and cyclophilin A deciphered by accelerated molecular dynamics simulations
Source: Royal Society of Chemistry journal article supplement (doi:10.1039/d2cp01975b), 2022-01-01
Supplement: d2cp01975b1.pdf [file d2cp01975b1.pdf]

## Supplemental Information

# Recognition between CD147 and cyclophilin A deciphered by accelerated molecular dynamics simulations

*Zhiwei Yang,<sup>\*, #, 1</sup> Yongjian Zang,<sup>#, 1</sup> He Wang,<sup>1</sup> Ying Kang,<sup>1</sup> Jianwen Zhang,<sup>1</sup> Xuhua Li,<sup>1</sup> Lei  
Zhang,<sup>1</sup> Shengli Zhang<sup>\*, 1</sup>*

---

<sup>1</sup> MOE Key Laboratory for Nonequilibrium Synthesis and Modulation of Condensed Matter, School of Physics, Xi'an Jiaotong University, Xi'an 710049, China

<sup>#</sup> The two authors contributed equally to this work.

**Table S1.** The detailed information on the CD147-CypA systems.

| system              | Docking site     |                 |            |              | P180A-G181A mutation | P211A mutation | R201A mutation |
|---------------------|------------------|-----------------|------------|--------------|----------------------|----------------|----------------|
|                     | CypA active site | CD147 P180-G181 | CD147 P211 | CD147 groove |                      |                |                |
| Model-0             | √                | ×               | ×          | √            | ×                    | ×              | ×              |
| Model-0-P180A-G181A | √                | ×               | ×          | √            | √                    | ×              | ×              |
| Model-0-P211A       | √                | ×               | ×          | √            | ×                    | √              | ×              |
| Model-0-R201A       | √                | ×               | ×          | √            | ×                    | ×              | √              |
| Model-1             | √                | √               | ×          | ×            | ×                    | ×              | ×              |
| Model-1-P180A-G181A | √                | √               | ×          | ×            | √                    | ×              | ×              |
| Model-1-P211A       | √                | √               | ×          | ×            | ×                    | √              | ×              |
| Model-2             | √                | ×               | √          | ×            | ×                    | ×              | ×              |
| Model-2-P180A-G181A | √                | ×               | √          | ×            | √                    | ×              | ×              |
| Model-2-P211A       | √                | ×               | √          | ×            | ×                    | √              | ×              |

**Table S2.** The binding free energy between CD147 and CypA in different mutant models.

|                     | $\Delta E_{vdw}^a$ | $\Delta E_{ele}^b$ | $\Delta E_{GB}^c$ | $\Delta E_{surf}^d$ | $\Delta G_{bind}$ |
|---------------------|--------------------|--------------------|-------------------|---------------------|-------------------|
| model-0-P180A-G181A | $-57.50 \pm 1.50$  | $-437.07 \pm 7.52$ | $478.40 \pm 7.83$ | $-8.62 \pm 0.21$    | $-24.80 \pm 1.18$ |
| model-0-P211A       | $-86.55 \pm 1.11$  | $-554.94 \pm 5.73$ | $618.68 \pm 5.61$ | $-12.68 \pm 0.15$   | $-35.49 \pm 1.06$ |
| model-0-R201A       | $-53.15 \pm 1.82$  | $-400.45 \pm 6.12$ | $438.30 \pm 6.27$ | $-7.49 \pm 0.23$    | $-22.77 \pm 0.65$ |
| model-1-P180A-G181A | $-70.54 \pm 0.68$  | $-578.16 \pm 5.12$ | $637.35 \pm 4.74$ | $-10.72 \pm 0.10$   | $-22.07 \pm 1.04$ |
| model-1-P211A       | $-66.01 \pm 1.06$  | $-474.61 \pm 5.98$ | $523.50 \pm 5.43$ | $-9.63 \pm 0.13$    | $-26.74 \pm 0.77$ |
| model-2-P180A-G181A | $-69.95 \pm 0.81$  | $-399.23 \pm 3.36$ | $455.24 \pm 3.34$ | $-9.92 \pm 0.10$    | $-23.87 \pm 0.71$ |
| model-2-P211A       | $-53.55 \pm 1.97$  | $-411.50 \pm 6.99$ | $451.97 \pm 5.93$ | $-7.37 \pm 0.20$    | $-20.46 \pm 1.54$ |

<sup>a</sup>van der Waals connection, <sup>b</sup>Electrostatic connection, <sup>c</sup>Polar contribution of the solvation effect, <sup>d</sup>Non-polar contribution of solvation effect. (units in kcal mol<sup>-1</sup>)

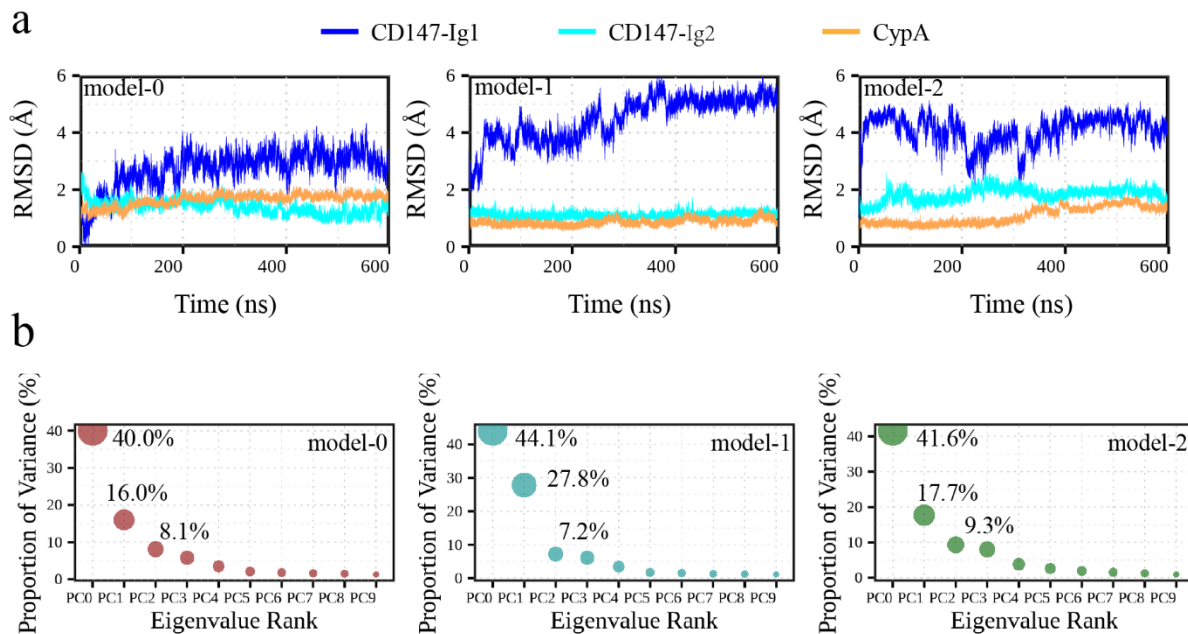

**Fig. S1** (a) The root-mean-square deviation (RMSD) of Ig1 domain (blue), Ig2 domain (cyan) and CypA (orange) in model-0, model-1 and model-3 simulations. (b) Percentage of top ten PCs in the three CD147-CypA complex models.

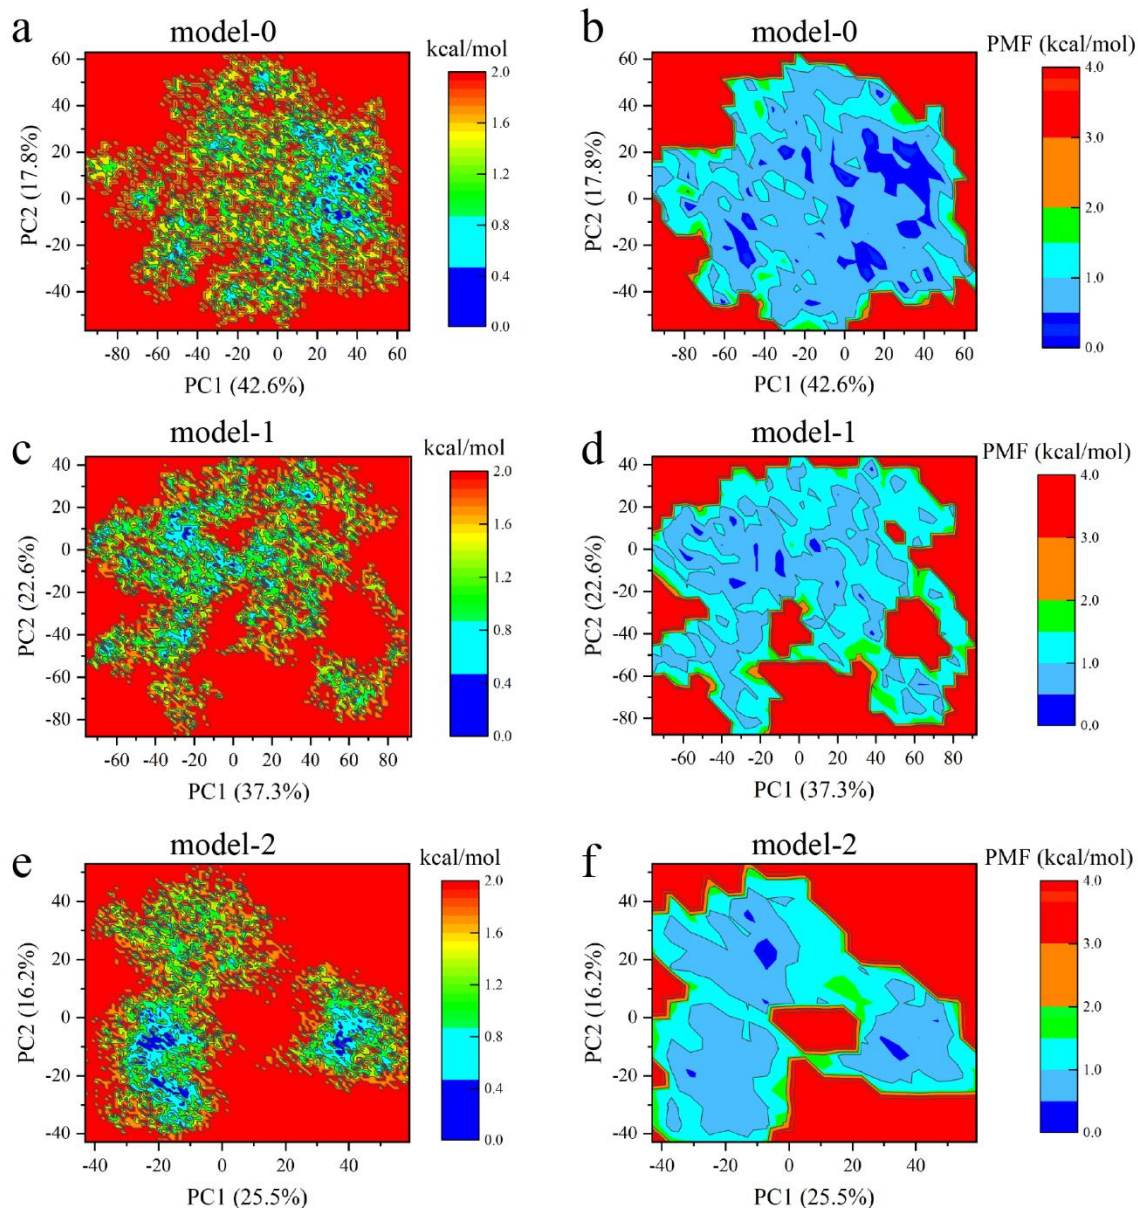

**Fig. S2** The free-energy surfaces of CD147-CypA complexes generated using PC1 and PC2 in (a) model-0, (c) model-1 and (e) model-2 simulations. The aMD simulations were reweighted using the PyReweighting toolkit to calculate the 2D PMF profiles of PC1 and PC2 in (b) model-0, (d) model-1 and (f) model-2 simulations. The results were constructed using the last 100 ns of aMD simulation trajectories.

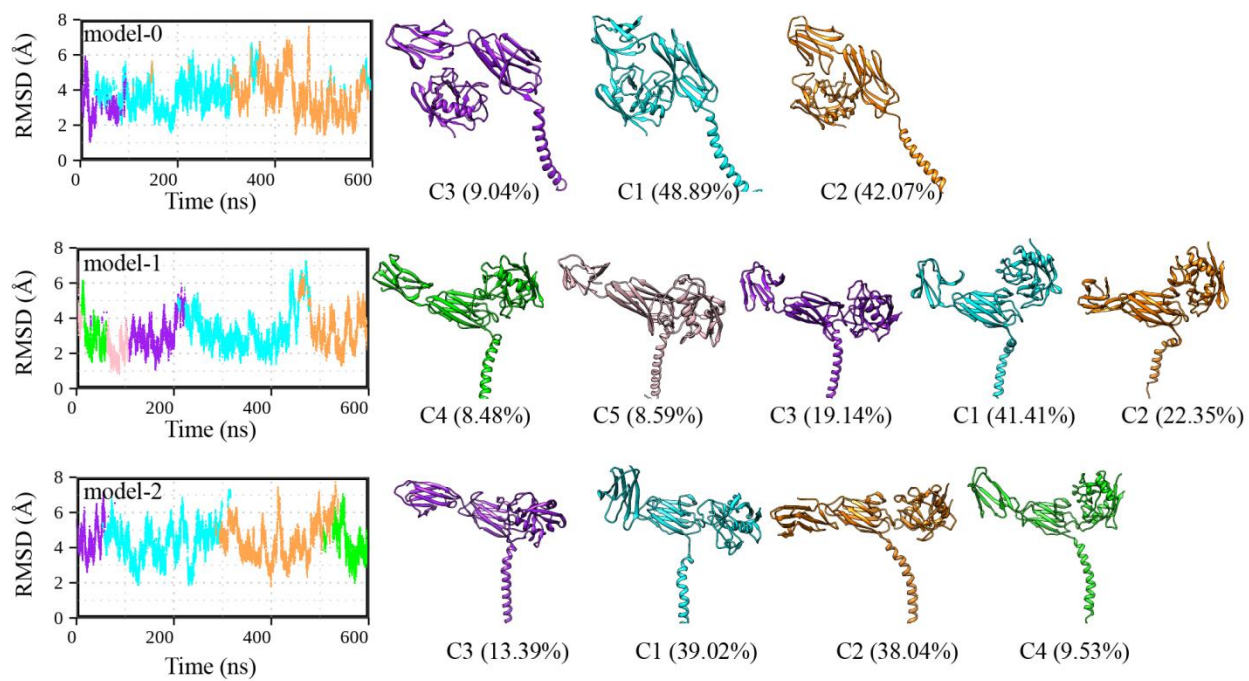

**Fig. S3** RMSD of CD147-CypA complex aligning to the centroidal structure of each cluster in the model-0, model-1, and model-2 simulations. Purple, cyan, orange, green, and pink colors correspond to the clusters. The representative conformations and percentages of each cluster are given.

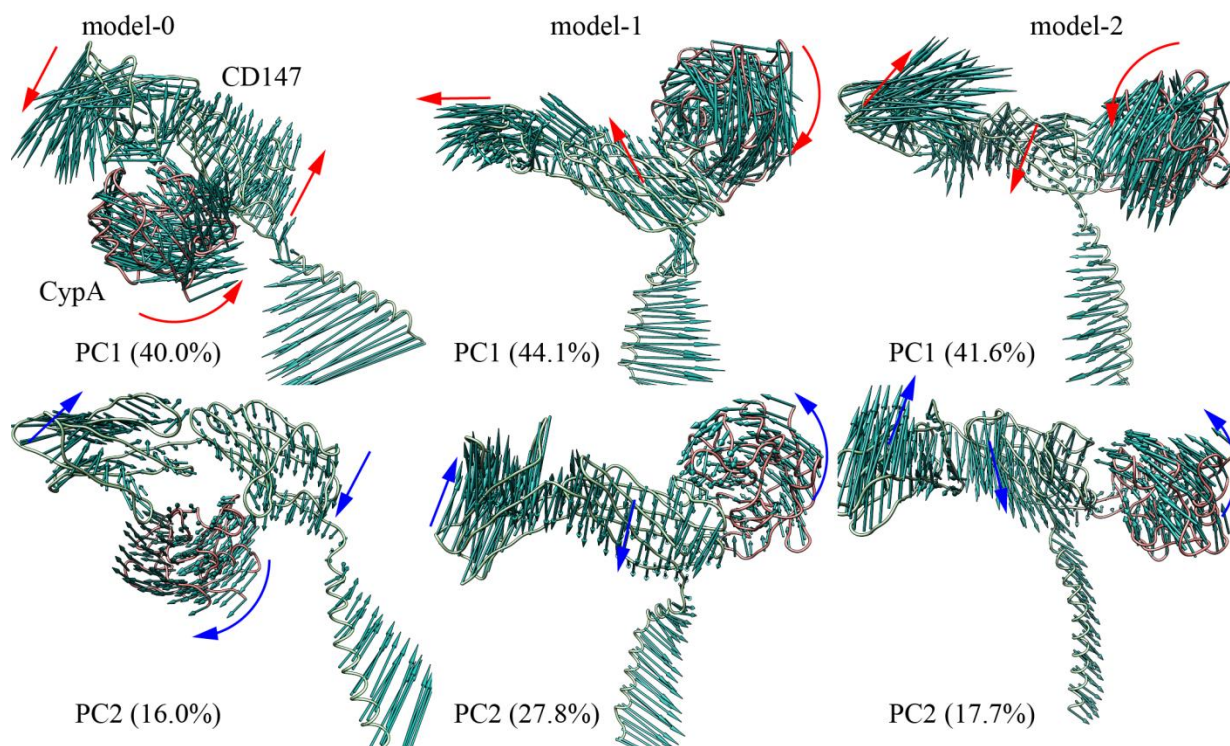

**Fig. S4** Vector field representations of the first two principal component (PC1 and PC2) obtained for CD147-CypA complex in the model-0, model-1 and model-2 simulations. The red and blue arrows representation of the first and second motion modes of CD147-CypA complex.

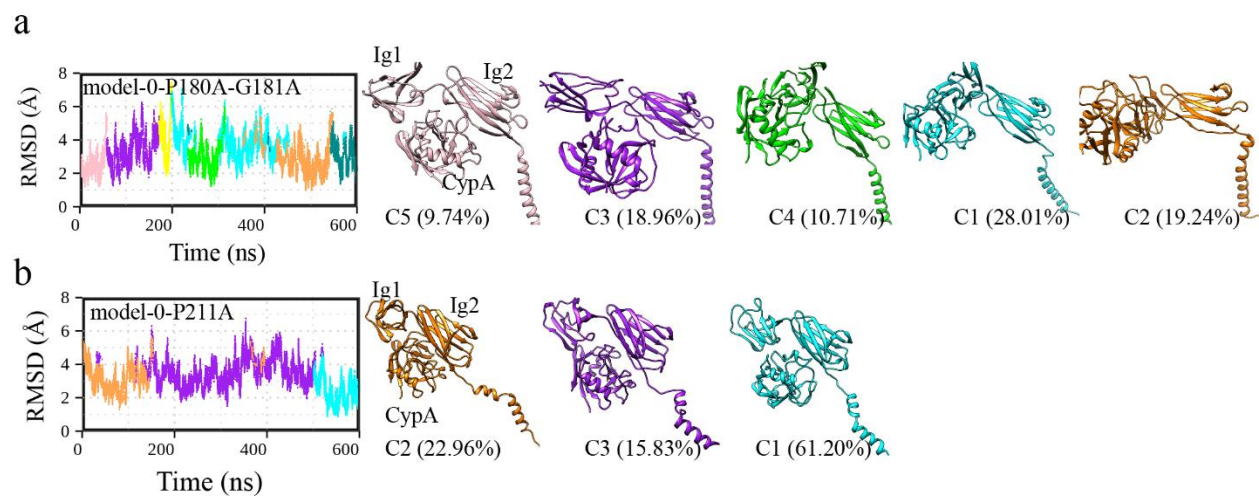

**Fig. S5** RMSD of CD147-CypA complex aligning to the centroidal conformation of each cluster in P180A-G181A and P211 mutant model-0 simulations. Purple, cyan, orange, green, pink, yellow, and light tea green colors correspond to the clusters. The representative conformations and percentages of the first five clusters are given.



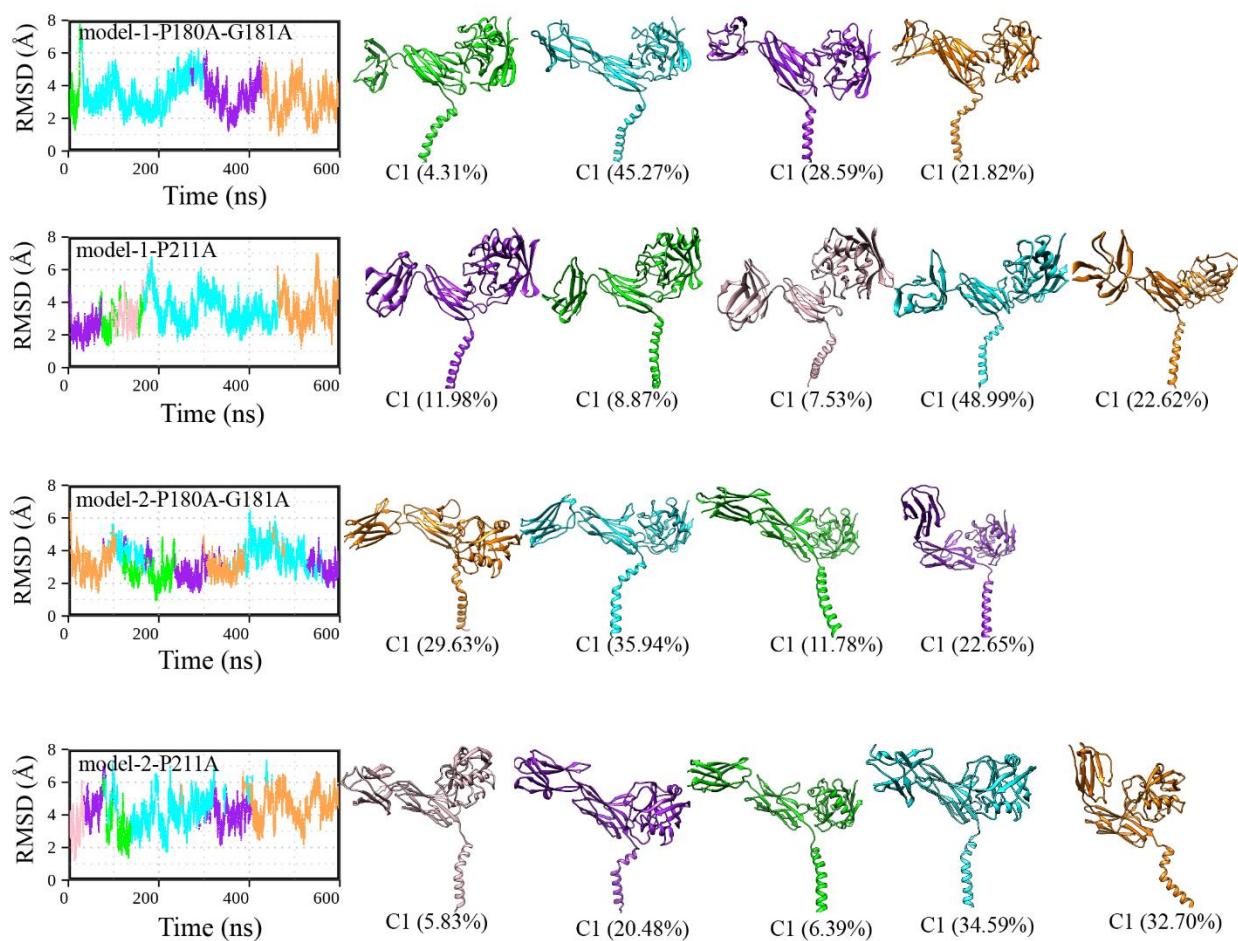

**Fig. S6** RMSD of CD147-CypA complex aligning to the centroidal conformation of each cluster in mutant model-1 and model-2 simulations. Purple, cyan, orange, green, pink, yellow, and light tea green colors correspond to the clusters. The representative conformations and percentages of the first five clusters are given.

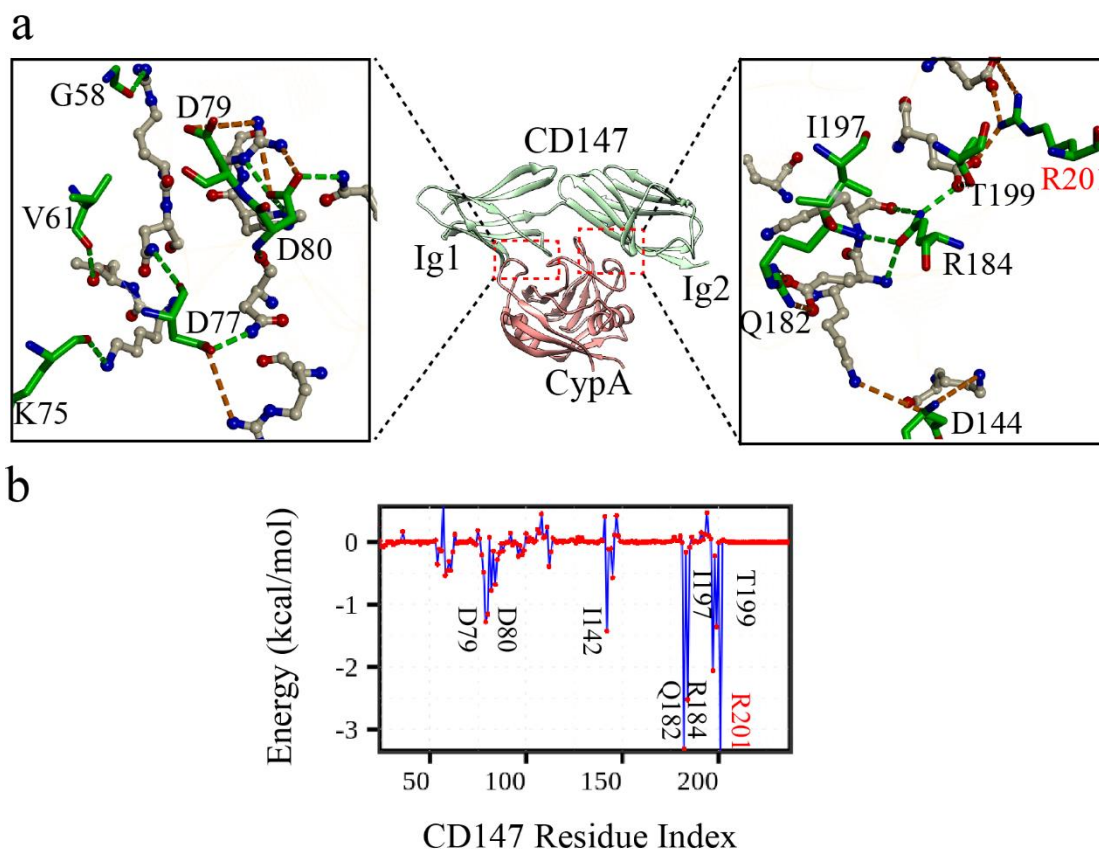

**Fig. S7** Key residues in the interaction interface between CD147 and CypA in model-0. (a) Interaction networks between CD147 and CypA. The residues of CD147 and CypA are highlighted using the stick, and ball and stick models, respectively. The important H-bonding interactions are highlighted by the green dotted lines, the salt bridge and electrostatic interactions are in orange dotted lines. (b) Per-residue of CD147 decomposition of the binding free energy of CD147 with CypA.

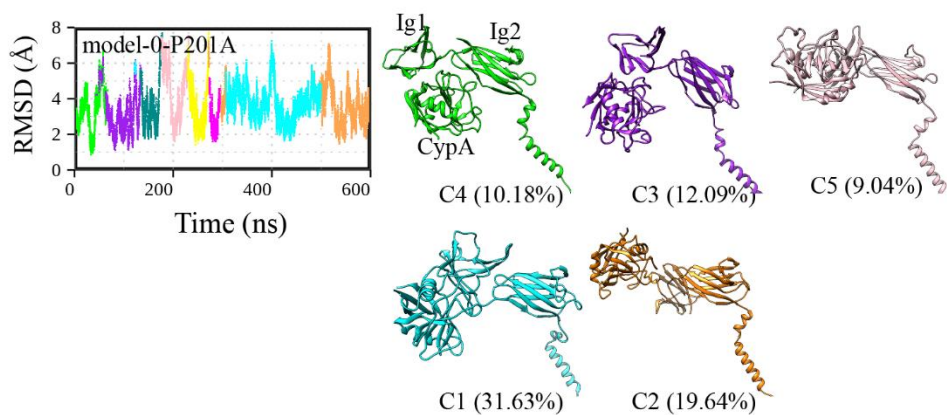

**Fig. S8** RMSD of CD147-CypA complex aligning to the centroidal conformation of each cluster in model-0-R201A simulation. Purple, cyan, orange, green, pink, tan1, yellow, and light tea green colors correspond to the clusters. The representative conformations and percentages of the first five clusters are given.
